# Supplementary material for: Observation of fractional spin textures and bulk-boundary correspondence
Source: Research Square preprint supplement (doi:10.21203/rs.3.rs-136696/v1), 2021-01-29
Supplement: Supplementary file 1 [file 3eb4d3600b84a0299a8ddd75.docx]

**Supplementary information**

**Fractional antiskyrmions and elliptical Bloch skyrmions**

**in a Heusler material**

Jagannath Jena1, Börge Göbel2, Tomoki Hirosawa3, Sebastián A. Díaz4, Taichi Hinokihara3,5, Vivek Kumar6, Ingrid Mertig2, Claudia Felser6, Daniel Loss4, and Stuart Parkin1*

1 Max Planck Institute of Microstructure Physics, Weinberg 2, 06120 Halle, Germany

2 Institute of Physics,Martin Luther University Halle-Wittenberg, 06120 Halle, Germany

3 Department of Physics, University of Tokyo, Bunkyo, Tokyo 113-0033, Japan

4 Department of Physics, University of Basel, Klingelberg Strasse 82, CH-4056 Basel, Switzerland

5 Elements Strategy Initiative Center for Magnetic Materials, National Institute for Materials Science, Tsukuba, Ibaraki 305-0047, Japan

6 Max Planck Institute for Chemical Physics of Solids, Nöthnitzer Strasse 40, 01187 Dresden,

Germany

*****Corresponding author: [stuart.parkin@mpi-halle.mpg.de](mailto:stuart.parkin@mpi-halle.mpg.de)

**Formation of fractional antiskyrmions at low temperature**

In our Mn1.4Pt0.9Pd0.1Sn sample, we find that antiskyrmions are stable at room temperature and above, whereas elliptical Bloch skyrmions are found at low temperatures1. However, one is able to observe antiskyrmions at low temperatures using the following field cooling procedure, as schematically shown in Fig. S4a. On stabilizing a square antiskyrmion lattice at room temperature in the presence of a constant perpendicular magnetic field, we reduce the specimen's temperature to 100 K. Fig. S4b shows a typical Lorentz transmission electron microscopy (LTEM) image taken at 100 K and in the presence of a 200 mT field. Here, we focus on the region at the edge of the sample identified by the yellow rectangle in Fig.S4b to illustrate the formation of fractional antiskyrmions. The initial state within this rectangle consists of square antiskyrmions as shown in Fig. S4c. On reducing the magnetic field, those antiskyrmions that are touching the edge of the sample become fractional antiskyrmions (Fig. S4d). The size of these fractional nano-objects reduces as the field crosses zero and increases in strength in the negative direction (Fig. S4e and S4f). The fractional antiskyrmions become triangularly-shaped in the field region from -72 mT to -224 mT (Fig. S4g and S4j).

**Magnetic textures and competing interactions**

Previous studies have pointed out that the dipolar interaction plays an important role in Heusler compounds such as Mn1*.*4Pt0*.*9Pd0*.*1Sn1,2. This is particularly prominent at low temperatures, where elliptically deformed Bloch skyrmions are stabilized despite the anisotropic Dzyaloshinskii–Moriya interaction that favors antiskyrmions1. In our studies, at higher temperatures - room temperature and above - we do not observe these elliptically deformed Bloch skyrmions but rather only antiskyrmions as the concomitant decrease in the total magnetization of the sample suppresses the dipolar interactions. Therefore, this Heusler material provides a unique opportunity to study the competition between the Dzyaloshinskii–Moriya interaction, dipolar interactions, as well as the easy-axis anisotropy, at finite temperatures.

We have searched for parameters within our atomistic spin Hamiltonian model (see Methods) that can qualitatively reproduce the experimental results of the main text. Our system consists of 50 × 50 × 5 spins with free boundary conditions, , and . To efficiently perform Monte Carlo simulations, we employ the stochastic cut-off (SCO) method adapted for long-range dipolar interactions, which drastically reduces the computational cost for three-dimensional systems3-5. Our bond-switching algorithm for implementing the SCO method is based on Ref. 5. Starting from a thermal configuration, the temperature is lowered from to in 30 steps, each one consisting of 20,000 Monte Carlo steps. The magnetic configuration for each parameter set {,} is obtained by taking the thermal average over 1000 samplings.

Fig. S6a-d show the magnetic textures obtained with increasing easy-axis anisotropy for . When the easy-axis anisotropy is sufficiently small, the in-plane vortex phase is the most stable configuration and carries no topological charge. As the easy-axis anisotropy is increased, various topological objects are stabilized. Crucially, elliptical Bloch skyrmions are first stabilized at , which have a swirling spin texture like the vortex phase as shown in Fig. S6b. Further increasing the easy-axis anisotropy favors the formation of antiskyrmions. Non-topological bubbles are obtained as a metastable state at the boundary between antiskyrmions and elliptical Bloch skyrmions. Therefore, our study suggests that the easy-axis anisotropy also plays an important role in stabilizing elliptical Bloch skyrmions in Heusler materials.

In Fig. S6e we summarize our results on the stability of different topological spin structures as a function of the Dzyaloshinskii–Moriya interaction and easy-axis anisotropy , obtained by single-shot Monte Carlo simulations. We conclude that the stability of elliptical Bloch skyrmions and antiskyrmions is determined by the competition among the dipolar interaction, Dzyaloshinskii–Moriya interaction, and easy-axis anisotropy. In particular, for , Bloch skyrmions could coexist with antiskyrmions depending on the strength of the easy-axis anisotropy.

**Dynamics of conversion and annihilation**

To further investigate the conversion and annihilation mechanisms as the magnetic field is varied, we performed atomistic spin dynamics simulations. An initial spin configuration was prepared for 200 × 200 × 5 spins with free boundary conditions using the efficient Monte Carlo simulated annealing protocol described in the previous section. We chose magnetic parameters, , that allow the formation of a mixture of antiskyrmions, elliptical Bloch skyrmions, and non-topological bubbles. Then, as the magnetic field was varied, the initial spin configuration was time-evolved using the stochastic Landau-Lifshitz-Gilbert equation6 with the temperature and Gilbert damping fixed at and , respectively.

The magnetic field protocol begins with a linear reduction from to by 10 decrements of 200 time steps each. During the next 8,000 time steps the magnetic field is kept constant allowing the magnetic texture to relax. Then the field is linearly increased by 10 increments of 200 time steps from to and is kept at that final value for 10,000 more time steps. Each time step has a duration of , which for meV and approximates to ps.

Supplementary Video 1 shows the time evolution of the magnetic texture obtained by taking the thermal average over consecutive 200 time steps intervals. As the magnetic field is lowered, stripe domains are formed in the interior via elongation or merging of objects. We find that the merging, mediated by the formation of monopoles7, often occurs between different topological objects having parallel in-plane magnetizations at the merging points. After the field reaches the minimum value , more objects in the interior merge resulting in longer stripe domains, and fractional objects along the sample edges are formed. Here, we note that thermal fluctuations are necessary to overcome the energy barrier induced by the texture edge twist. The importance of thermal fluctuations becomes more evident as the magnetic field is increased again. While the annihilation and conversion occur spontaneously for smaller fractional objects, the conversion of a long fractional object with a longer extension into the bulk region to an integer topological charged object requires a long relaxation time. The total number of interior objects got reduced because their initial merging formed stripe domains that then simply shrank into single objects. Our simulation successfully reproduces the experimentally observed conversion and annihilation mechanisms, and suggests the importance of thermal fluctuations for the continuous transformation of topological charges.

**Supplementary figures**

**
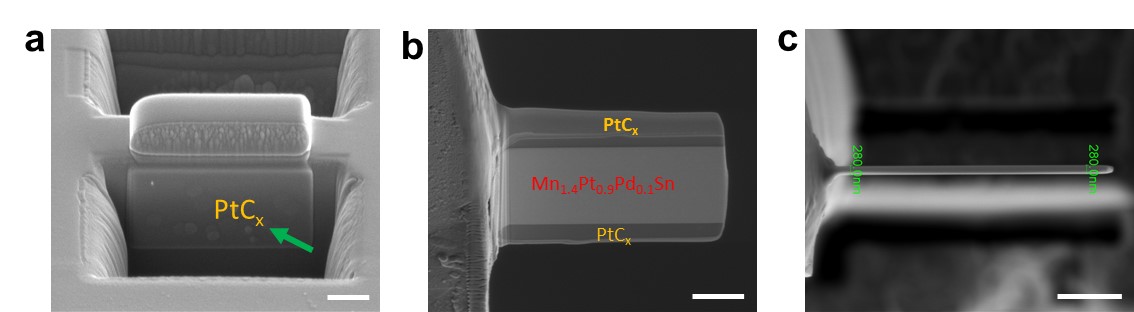
**

**Fig. S1**. **Lamella preparation using focused ion beam milling.** Lamellae specimens used for LTEM imaging are formed from bulk polycrystalline samples of Mn1.4Pt0.9Pd0.1Sn using focused ion milling. An individual grain, that is single crystalline, is identified whose crystal orientation is such that the [001] axis is perpendicular to the lamella that will be formed. EBSD (electron back scattering diffraction) is used for this purpose within the focused ion beam (FIB) apparatus. (**a**) Before lifting out the specimen from the bulk sample, the surfaces of the two sides of the specimen through which the electron beam is transmitted are polished using a low energy Ga+ ion beam of 2 keV and 4 pA until the surfaces are smooth. Then, PtCx is deposited on both these surfaces using an electron beam to decompose a Pt organometallic compound. One of these surfaces is indicated by the green arrow. (**b**) Overview of the prepared lamella after removal from the host grain and attachment to a standard TEM copper grid. The deposited PtCx layers on the top and bottom of the Mn1.4Pt0.9Pd0.1Sn lamella are indicated in the figure. (**c**) Shows the thickness of the prepared lamella at zero-tilt stage conditions. The lamella is thick. The white scale bars in each figure correspond to 2 m. More details on the preparation method can be found elsewhere1.


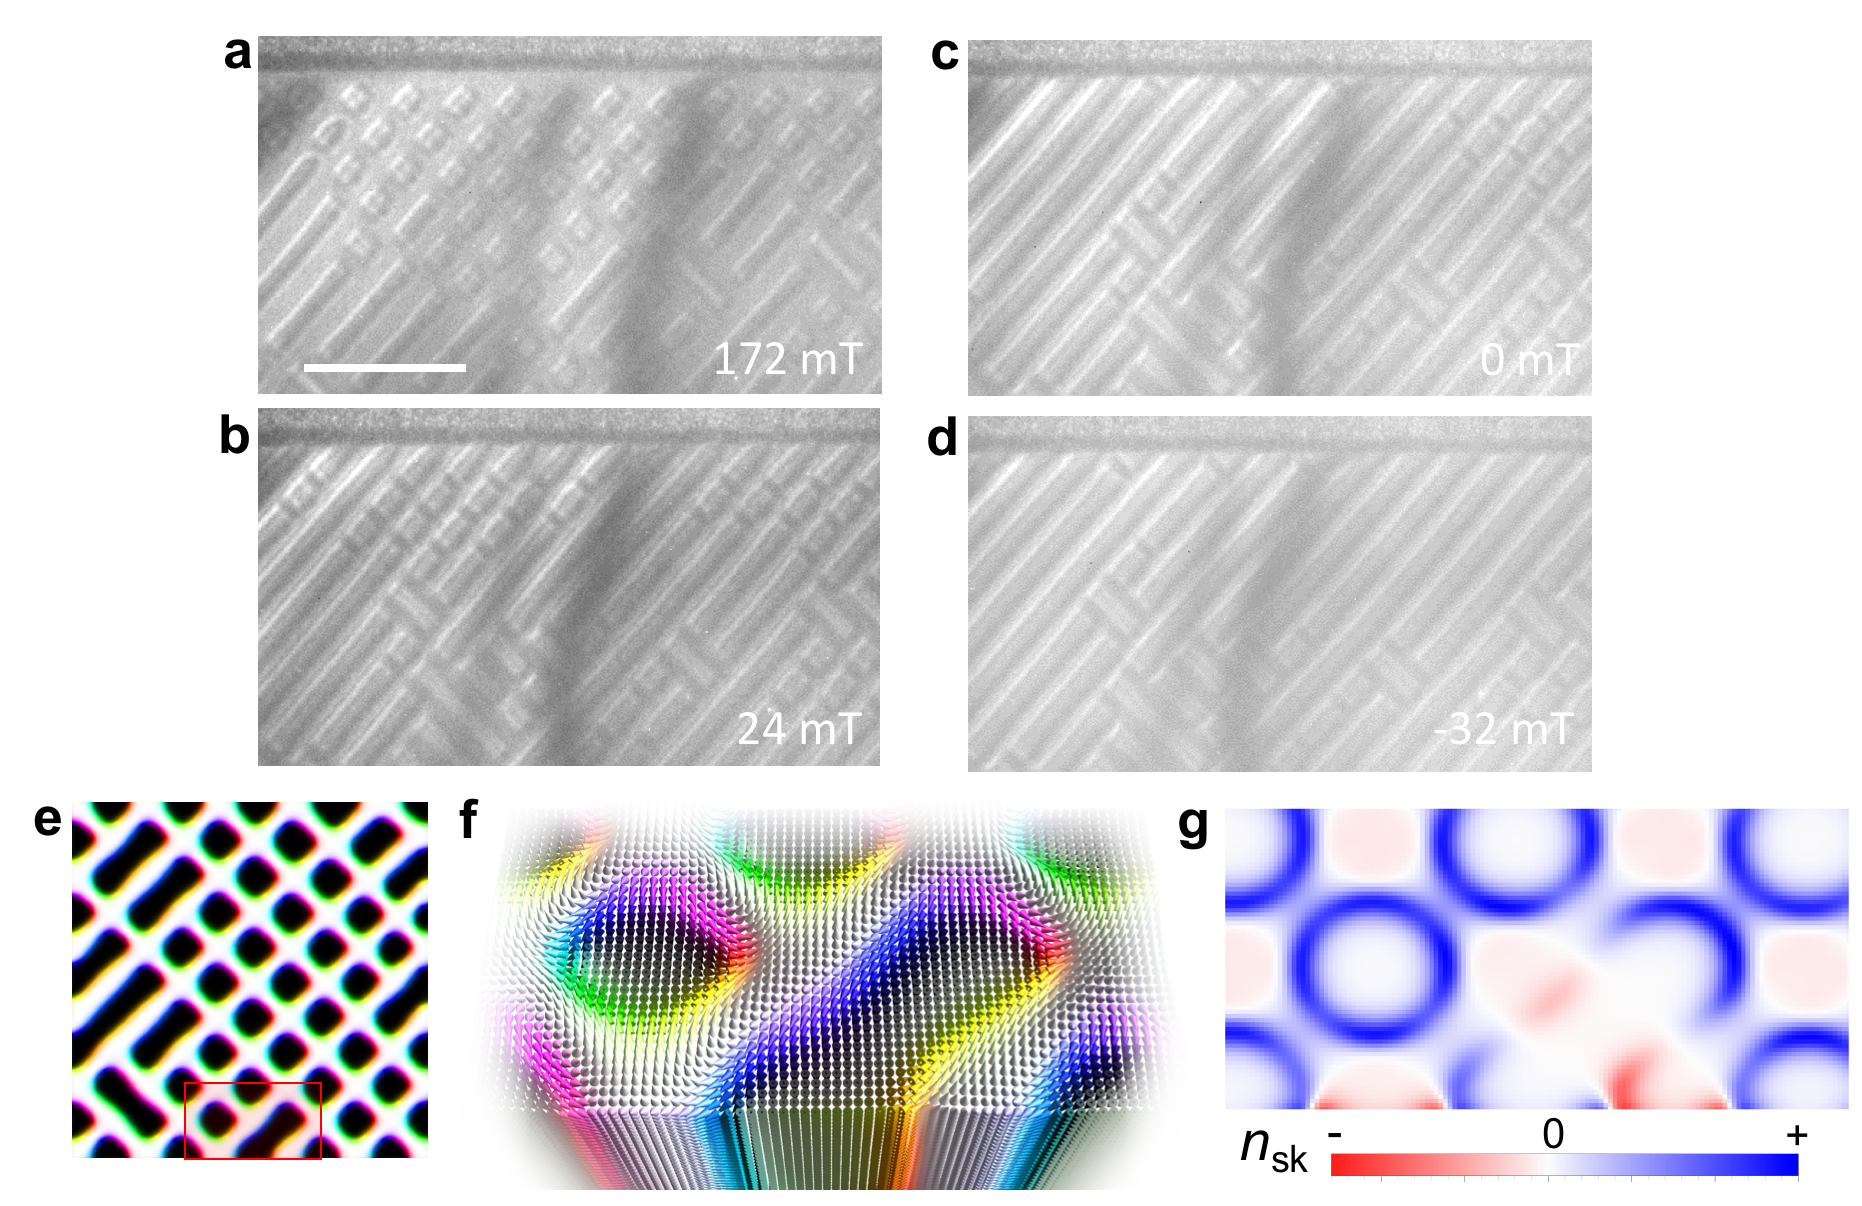


**Fig. S2. Formation of fractional antiskyrmions from a disordered state.** (**a**) The lamella is filled with a less dense lattice of antiskyrmions and short helices (rectangular shape) at room temperature and 172 mT. (**b**) At 24 mT, antiskyrmions near the edge get elongated and fractional antiskyrmions form. (**c, d**) At 0 and -32 mT, fractional antiskyrmions at the edge join with interior antiskyrmions and the region is filled with long helices. (**e**) Micromagnetic simulation of the disordered antiskyrmion lattice with fractional antiskyrmions at the edge. The color code corresponds to the orientation of the magnetic moments. **(f)** A magnified view of the area identified by the red rectangle in (**e**) with arrows indicating the orientation of the magnetic moments. **(g)** The topological charge density of the spin texture in (**f**). The scale bar in (**a**) corresponds to 1 .


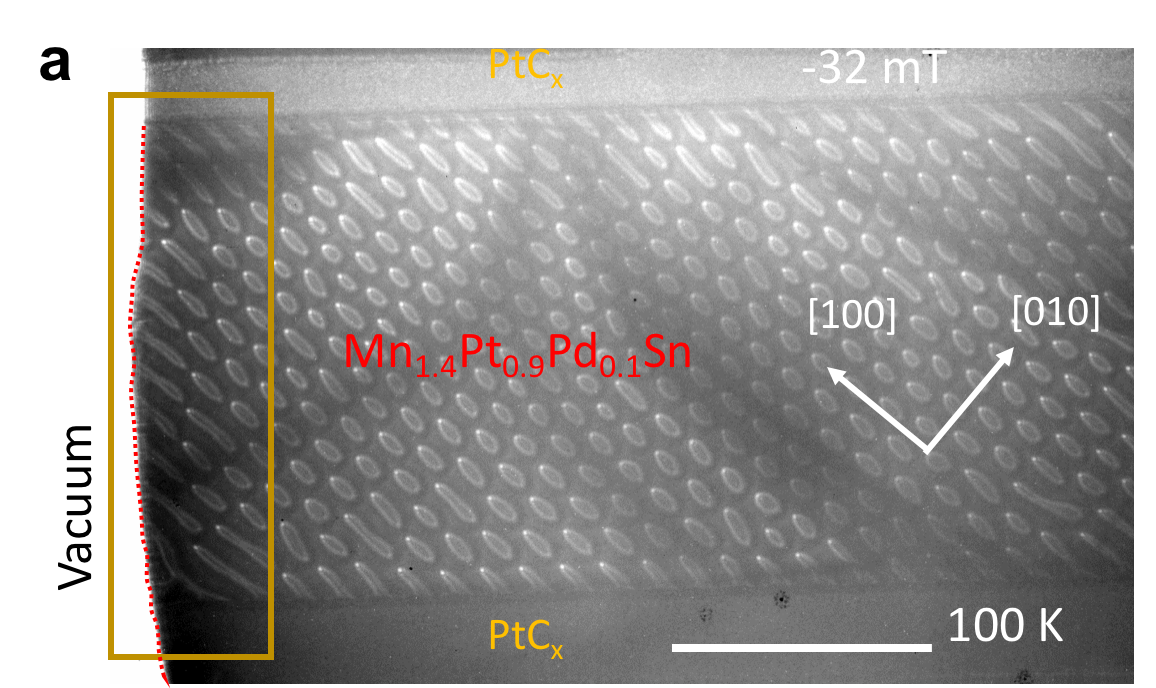

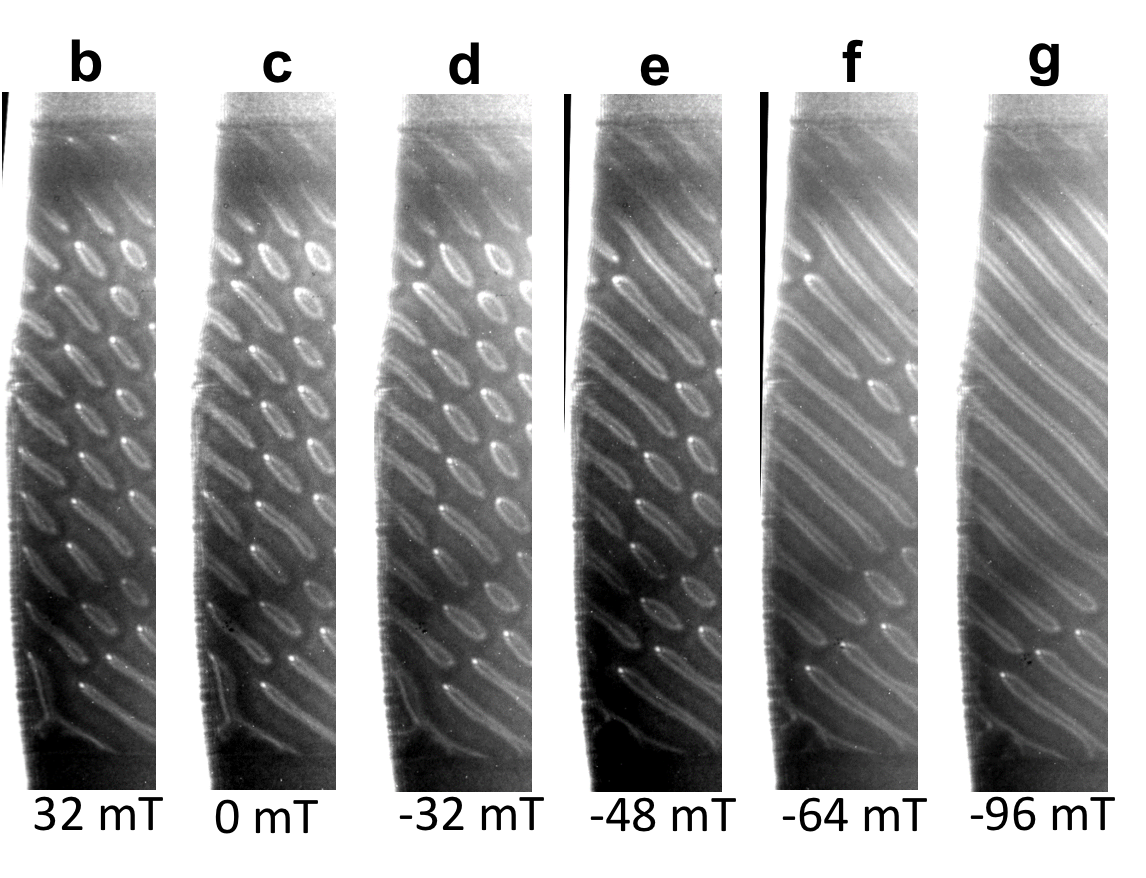

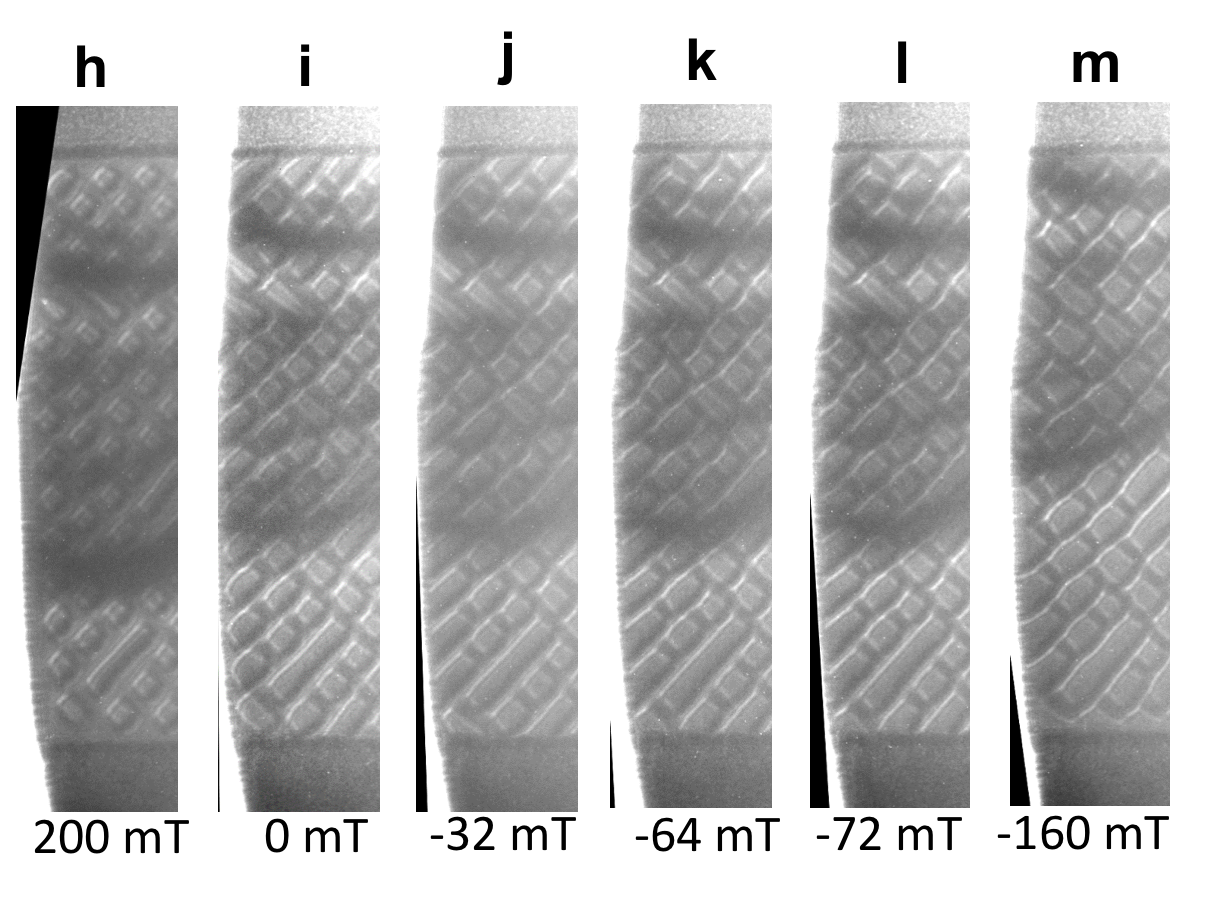


**Fig. S3. Fractional nano-objects at the interface of Mn1.4Pt0.9Pd0.1Sn and vacuum.** (**a**) An extended lamella formed from Mn1.4Pt0.9Pd0.1Snshowing three interface regions: top and bottom interfaces are formed when PtCx is deposited on the sides of the lamella in the FIB system and the third interface is formed at the interface of the lamella and vacuum. This last interface is marked by the red dashed curve. The region identified by the yellow rectangle is shown at different fields and various protocols in (**b-g**) and (**h-m**) at 100 K. In (**b-g**) the sample was cooled in zero field from room temperature to 100 K. Then, at 100 K, the field is systematically reduced to observe fractional Bloch skyrmions after a dense lattice state of elliptical Bloch skyrmions is formed at higher magnetic fields. In (**h-m**) the sample is field cooled in 200 mT from 300K to 100 K. Then the magnetic field is reduced to observe the fractional antiskyrmions. The scale bar in (**a**) corresponds to .


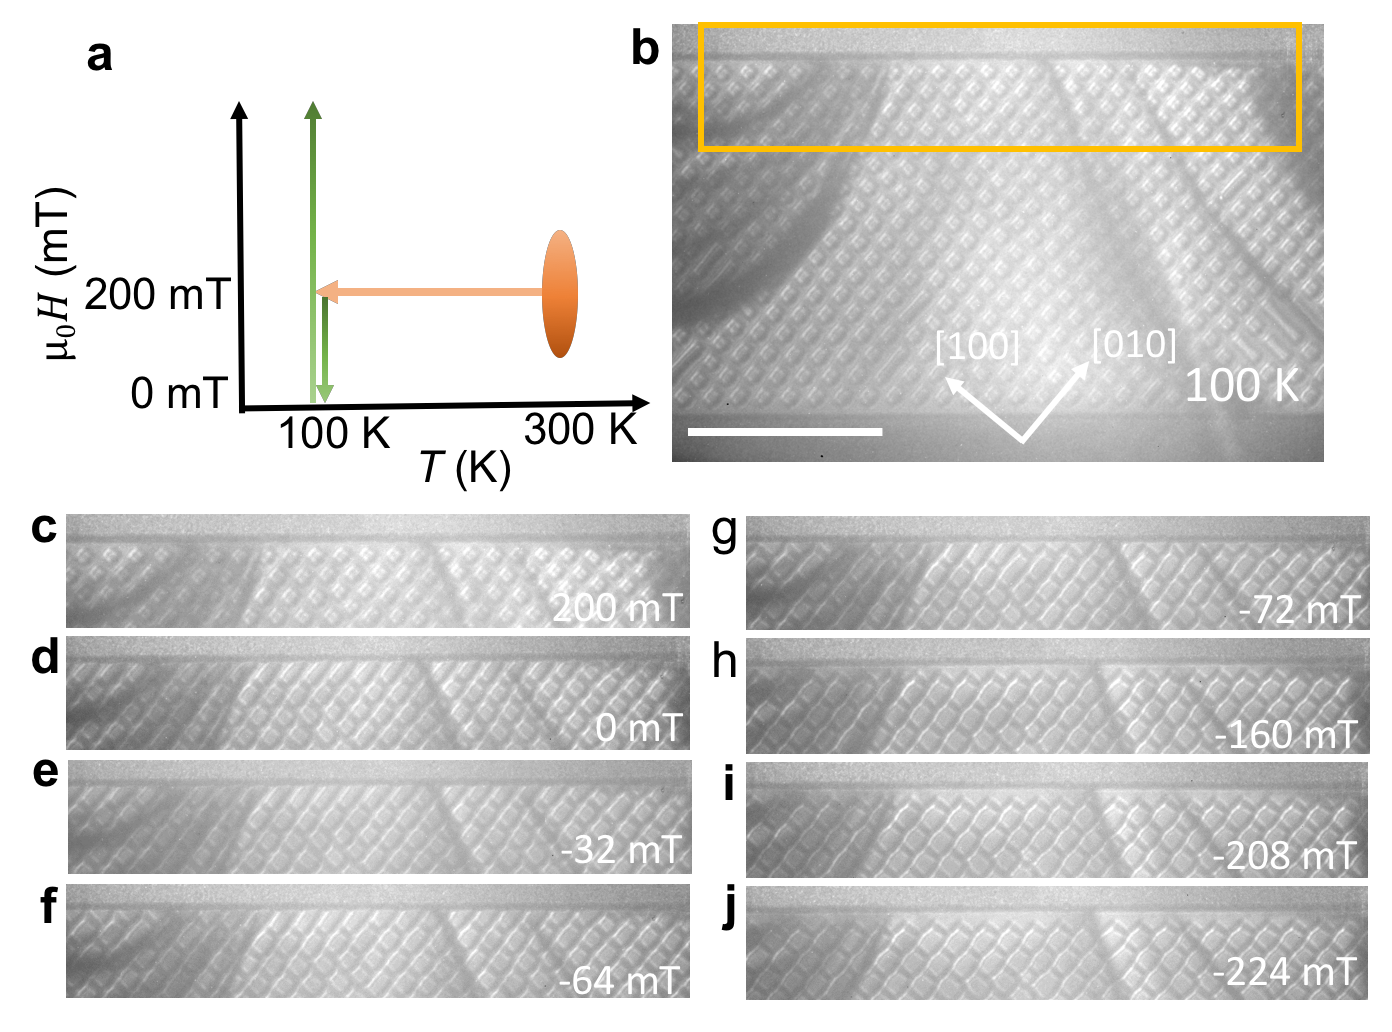


**Fig. S4. Fractional antiskyrmions at low temperature.** (**a**) Schematic of field cooling protocol to stabilize a metastable antiskyrmion lattice at 100 K. (**b**) Square antiskyrmion lattice state at 100 K after cooling the specimen from 300 K in a field of 200 mT. The region marked by the yellow rectangle in (**b**) is shown in (**c-i**). Fractional antiskyrmions are formed at theMn1.4Pt0.9Pd0.1Sn - PtCx interface on reducing the magnetic field. The scale bar in (**b**) corresponds to 2


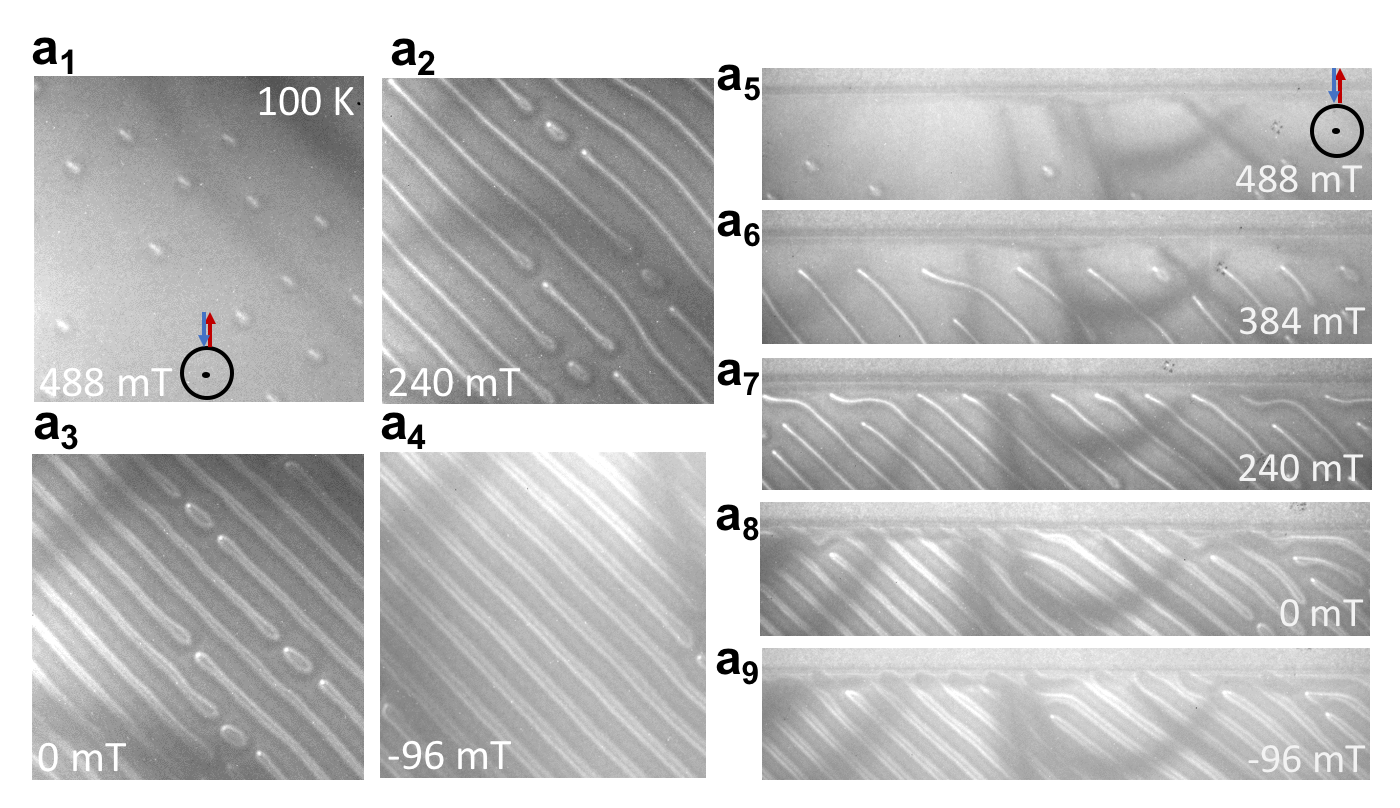

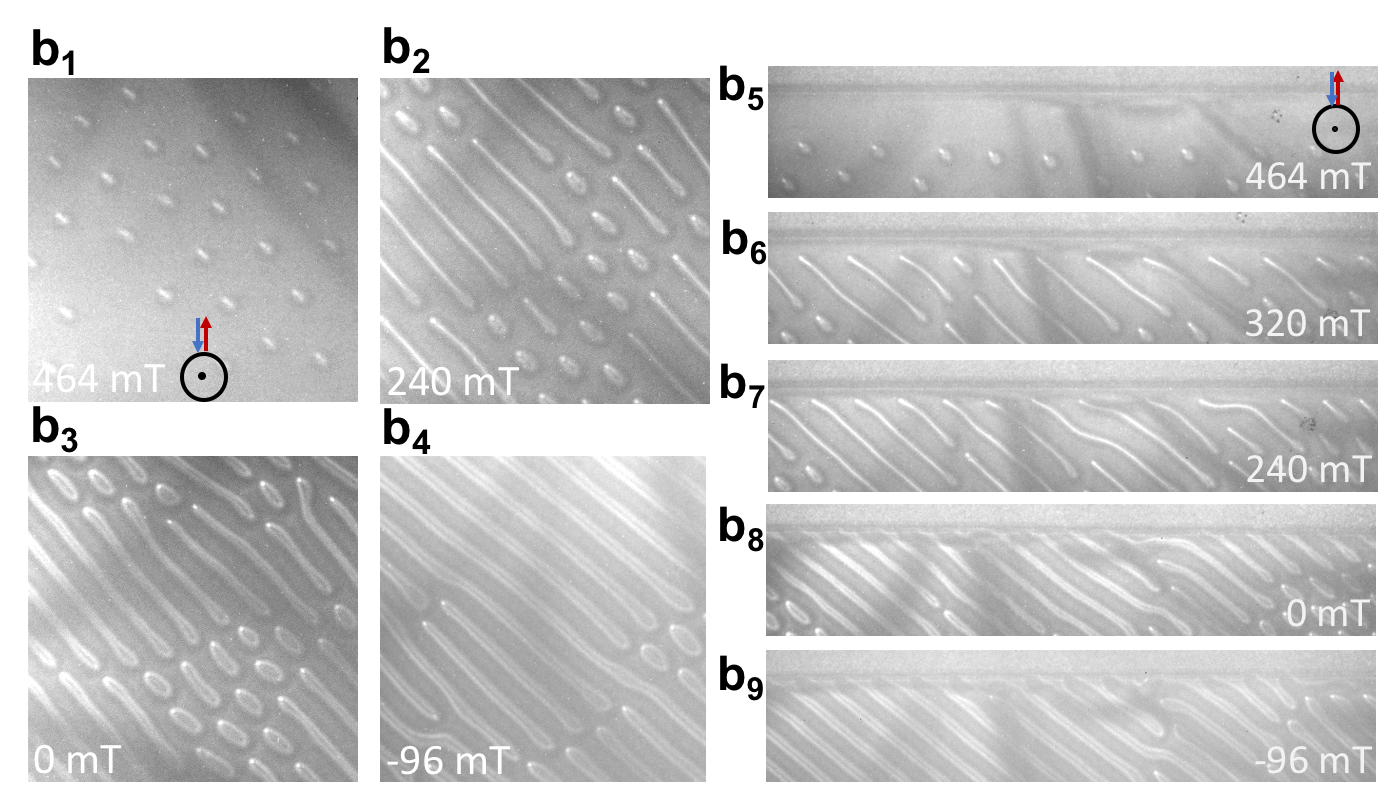

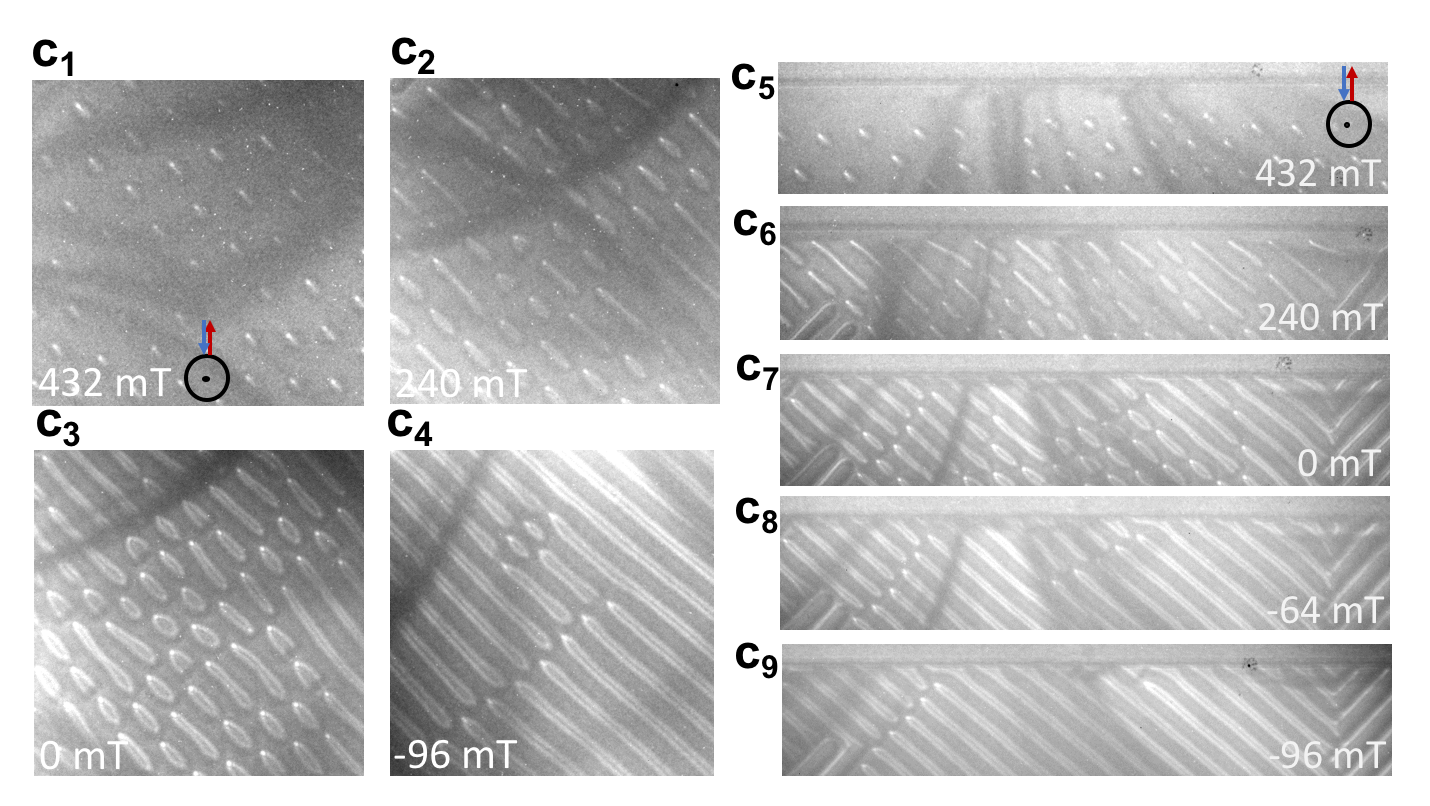

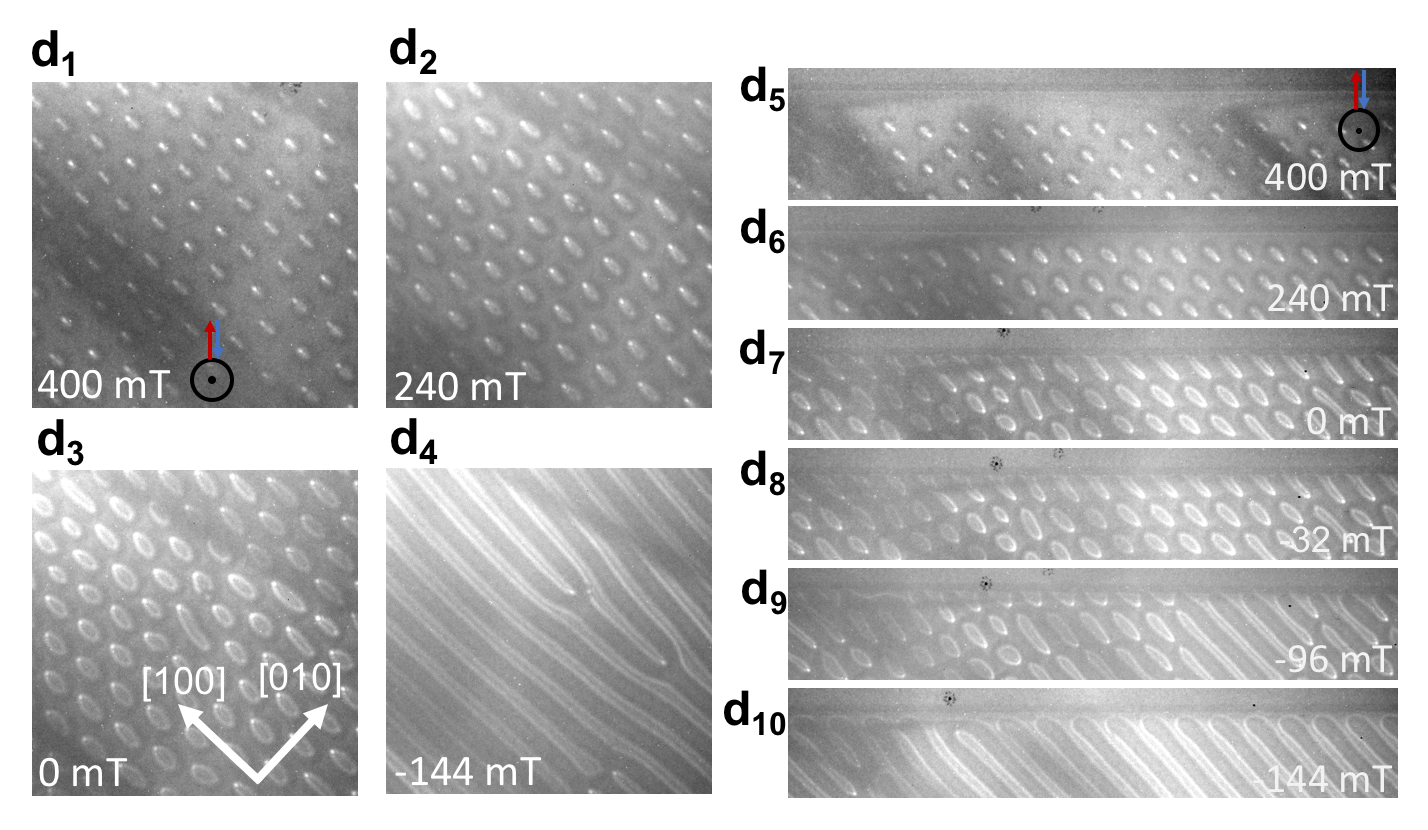


**Fig. S5. Density dependent formation of fractional nano-objects:** (**a1, b1, c1, d1**) Nano-objects with various densities are formed at different strengths of the magnetic field after the temporary application of an in-plane field component via tilting of the sample. The temporary tilting angle is 40. The various states are shown at 488 mT, 464 mT, 432 mT and 400 mT, respectively. The blue and red arrows indicate the direction of the temporary tilting of the specimen. (**a2-a4, b2-b4, c2-c4, d2-d4**) After that, the field is reduced till the formation of a helical state. LTEM images are shown from, firstly, a typical region of the lamella away from the edge. This region is square shaped. Secondly, the same yellow rectangular region identified in Fig. S4, that is representative of the interface between Mn1.4Pt0.9Pd0.1Sn and PtCx. (**a5-a9, b5-b9, c5-c9, d5-d10**) The interior and interface regions are shown at various magnetic fields. The number of fractional nano-objects formed at the interface depends on the density of the nano-objects in the lamella. The higher the density of these objects, the larger is the number of fractional objects at the interface. The dimension of the square shaped interior region is 2500 nm 2500 nm and the interface region has dimensions of 1300 nm 6000 nm.


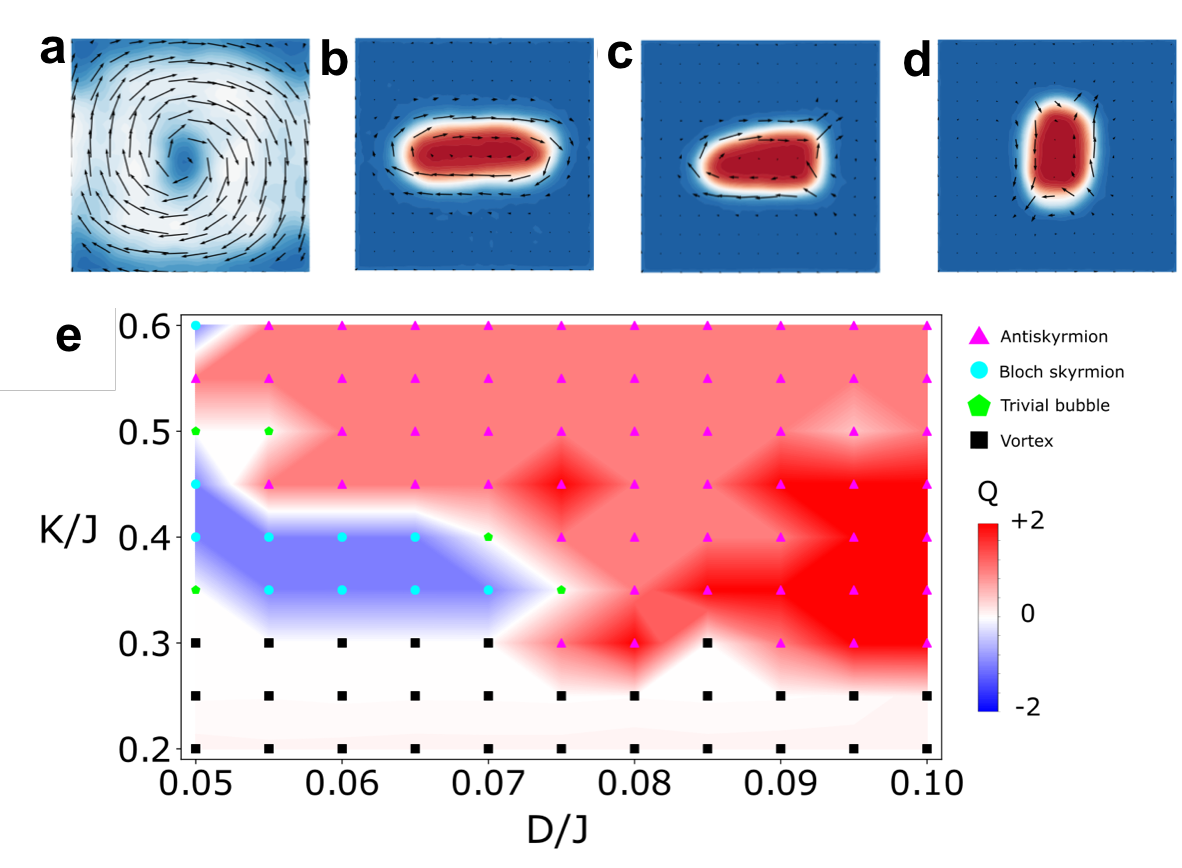


**Fig. S6.** **Magnetic textures stabilized from the competition among the dipolar interaction, Dzyaloshinskii–Moriya interaction, and easy-axis anisotropy.** (**a**)-(**d**) The magnetic textures of (**a**) a vortex, (**b**) a Bloch skyrmion, (**c**) a non-topological bubble, and (**d**) an antiskyrmion, stabilized at with increasing easy-axis anisotropy (**e**) Phase diagram as a function of the Dzyaloshinskii–Moriya interaction and easy-axis anisotropy . The color map indicates the net topological charge of the sample , where the topological charge density for a discrete lattice is defined in Ref. 8. In some cases, we obtain for two antiskyrmions and for edge fractional antiskyrmions. All the results are obtained in a 50 × 50 × 5 spin system using Monte Carlo simulated annealing with , , and .

**References**

1 Jena, J. *et al.* Elliptical Bloch skyrmion chiral twins in an antiskyrmion system. *Nat. Commun.* **11**, 1115 (2020).

2 Peng, L. *et al.* Controlled transformation of skyrmions and antiskyrmions in a non-centrosymmetric magnet. *Nat. Nanotechnol.* **15**, 181 (2020).

3 Mak, C. Stochastic potential switching algorithm for Monte Carlo simulations of complex systems. *J. Chem. Phys.* **122**, 214110 (2005).

4 Sasaki, M. & Matsubara, F. Stochastic cutoff method for long-range interacting systems. *J. Phys. Soc. Jpn.* **77**, 024004 (2008).

5 Hinokihara, T., Nishino, M., Toga, Y. & Miyashita, S. Exploration of the effects of dipole-dipole interactions in Nd2Fe14B thin films based on a stochastic cutoff method with a novel efficient algorithm. *Phys. Rev. B* **97**, 104427 (2018).

6 Skubic, B., Hellsvik, J., Nordström, L. & Eriksson, O. A method for atomistic spin dynamics simulations: implementation and examples. *J. Phys.: Condens. Matter* **20**, 315203 (2008).

7 Milde, P. *et al.* Unwinding of a skyrmion lattice by magnetic monopoles. *Science* **340**, 1076 (2013).

8 Berg, B. & Lüscher, M. Definition and statistical distributions of a topological number in the lattice O (3) σ-model. *Nucl. Phys. B* **190**, 412-424 (1981).
